# Supplementary material
Source: Royal Society of Chemistry journal article supplement (doi:10.1039/d5dt02965a)
Supplement: d5dt02965a1.pdf [file d5dt02965a1.pdf]

## SUPPLEMENTARY INFORMATION

### Structure–Performance Relationship in Copper Phthalocyanine-Based Supercapacitor Electrodes: Influence of Substituent Geometry from Molecular Design to Electrochemical Function

Şirin Siyahjani-Gültekin<sup>a\*</sup>, Berivan Arin Öztürmen<sup>b</sup>, Damla Şahin<sup>a</sup>, Gülşah Yılmaz<sup>a</sup>, Bahar Tosun Ercan<sup>a</sup>, Burak Gültekin<sup>a</sup>, Zekeriya Biyiklioglu<sup>b\*</sup>

---

<sup>a</sup>Ege University, Solar Energy Institute, Bornova, Bornova, 35100, İzmir, Türkiye

<sup>b</sup>Karadeniz Technical University, Faculty of Science, Department of Chemistry, Trabzon, Türkiye

#### 1.1. Materials and Equipments

4-[(3,4,5-Trimethoxybenzyl)oxy]phthalonitrile (TMe-CN) was synthesized according to literature [1]. A DLAB RE100-pro Rotary device was used as the evaporator. Using the ATR method, the IR spectra were captured on a Perkin Elmer 1600 FT-IR Spectrophotometer. Microflex LT MALDI-TOF mass spectrometer Bremen, Germany. The UV–Vis absorption spectra were recorded on DLAB SP-XUV5101 UV-Vis spectrophotometer at room temperature. The used materials and types of equipment are presented as Supplementary Information. Carbon Black (CB, 99.9% surface area, 75 m<sup>2</sup>/g) was obtained from Alfa Aesar. Poly(vinylidene fluoride-hexafluoropropylene) (PVDF-HFP) with an average molecular weight of about 400,000 g/mol was obtained from Sigma-Aldrich and used as a binder on the electrode. The 250 µm in thickness flexible graphite sheets used as current collectors were obtained from Nickunj Eximp Enterprises.

**Table S1.** Comparison of the electrochemical performance of CuPc/phthalocyanine-based supercapacitor electrode

| Material name / active type / structure type                                                                                        | Total mass in electrode & electrode area                                                           | Electrolyte                                                                                      | 3-electrode or 2-electrode                              | Potential window                                  | Current density / scan rate                                                                      | Specific capacitance (as reported)                                                                                                                     | Energy density                         | Power density                                     | Cycling stability                                                                                                 | Reference | Difference from the present work                                                                                            |
|-------------------------------------------------------------------------------------------------------------------------------------|----------------------------------------------------------------------------------------------------|--------------------------------------------------------------------------------------------------|---------------------------------------------------------|---------------------------------------------------|--------------------------------------------------------------------------------------------------|--------------------------------------------------------------------------------------------------------------------------------------------------------|----------------------------------------|---------------------------------------------------|-------------------------------------------------------------------------------------------------------------------|-----------|-----------------------------------------------------------------------------------------------------------------------------|
| BTCuPc; Cu phthalocyanine; HMPM-bridged ball-type Cu phthalocyanine on GCE                                                          | GCE area 0.076 cm <sup>2</sup> ; areal loading 0.5 mg cm <sup>-2</sup>                             | 3.0 M KCl (aq.)                                                                                  | Three-electrode                                         | 1.5 V (-0.5 to 1.0 V vs Ag/AgCl)                  | 2 A g <sup>-1</sup> ; 5 mV s <sup>-1</sup> ; 100 mV s <sup>-1</sup>                              | 265 F g <sup>-1</sup> at 2 A g <sup>-1</sup> ; 264.8/265 F g <sup>-1</sup> at 5 mV s <sup>-1</sup> ; 143.3 F g <sup>-1</sup> at 100 mV s <sup>-1</sup> | NR                                     | NR                                                | 87.75% after 2000 CV cycles at 100 mV s <sup>-1</sup>                                                             | [2]       | Ball-type bridged CuPc on GCE; no matched peripheral/non-peripheral isomer comparison under identical substituent chemistry |
| Co(NO <sub>2</sub> ) <sub>4</sub> Pc-rGO (1/6); Co phthalocyanine/rGO nanocomposite; tetranitro-substituted CoPc immobilized on rGO | NR                                                                                                 | NR                                                                                               | Three-electrode                                         | NR                                                | 4 A g <sup>-1</sup> ; 10–200 mV s <sup>-1</sup> explored                                         | 150.22 F g <sup>-1</sup> at 4 A g <sup>-1</sup>                                                                                                        | NR                                     | NR                                                | >100% after 5000 cycles at 10 A g <sup>-1</sup>                                                                   | [3]       | Composite strategy dominated by rGO synergy; not a clean positional-isomer CuPc comparison                                  |
| CuPc nanowires; pure Cu phthalocyanine; solution-processed nanowire film on Ni foam                                                 | 10 mg active material on 2 × 1 cm <sup>2</sup> Ni foam                                             | 1.0 M NaOH                                                                                       | Three-electrode                                         | 0–0.6 V vs Ag/AgCl (CV); 0–0.5 V vs Ag/AgCl (GCD) | 5–100 mV s <sup>-1</sup> ; 0.3 A g <sup>-1</sup>                                                 | 406 F g <sup>-1</sup> at 5 mV s <sup>-1</sup> ; 260 F g <sup>-1</sup> at 0.3 A g <sup>-1</sup>                                                         | NR                                     | NR                                                | ~85% retention after 3000 GCD cycles at 6 A g <sup>-1</sup>                                                       | [4]       | Pure CuPc morphology-controlled nanowire system; no substituent-position effect and no matched isomer pair                  |
| NiF/rGO2-2; MnPc/rGO hybrid; non-peripheral carbazole-substituted MnPc electrodeposited with rGO on Ni foam                         | Ni foam substrate; active mass defined on NiF, exact loading not clearly visible in extracted text | 2.0 M KOH                                                                                        | Three-electrode for electrode tests; ASC also assembled | 0–0.5 V (electrode); 0–1.5 V (ASC)                | 0.5–10 A g <sup>-1</sup> ; 10–50 mV s <sup>-1</sup>                                              | 512.4 F g <sup>-1</sup> at 0.5 A g <sup>-1</sup>                                                                                                       | 17.4 Wh kg <sup>-1</sup> (ASC)         | 375 W kg <sup>-1</sup> (ASC)                      | 88.1% after 5000 cycles at 10 A g <sup>-1</sup> (electrode); 74.6% after 5000 cycles at 5 A g <sup>-1</sup> (ASC) | [5]       | Also studies peripheral/non-peripheral substitution, but in a MnPc/rGO hybrid and partly device-level ASC format            |
| NiMe <sub>2</sub> Pc/CNT-COOH (6:10); Ni phthalocyanine/CNT nanocomposite; peripheral octamethyl-                                   | 1 mg active material per electrode on carbon paper/carbon                                          | 1 M H <sub>2</sub> SO <sub>4</sub> (three-electrode); PVA/H <sub>2</sub> SO <sub>4</sub> gel for | Three-electrode for electrode tests; two-electrode      | Device: 1.0 V for single SC; 3.0 V for three      | 0.25 A g <sup>-1</sup> (best electrode/device Cs); 100 mV s <sup>-1</sup> used in CV comparisons | 330.5 F g <sup>-1</sup> at 0.25 A g <sup>-1</sup> (electrode); 164.4 F g <sup>-1</sup> at 0.25 A g <sup>-1</sup>                                       | 22.8 Wh kg <sup>-1</sup> (solid-state) | 2469.6 W kg <sup>-1</sup> (solid-state SC); 250 W | 111.6% after 35,000 cycles at 8 A g <sup>-1</sup> (solid-state SC);                                               | [6]       | Peripheral NiPc/CNT composite optimized for practical solid-                                                                |

|                                                                                                                                                 |                                                                                                                                |                                    |                                                         |                   |                                                          |                                                      |                               |                                                   |                                                                                                                              |           |                                                                                                                                                                                      |
|-------------------------------------------------------------------------------------------------------------------------------------------------|--------------------------------------------------------------------------------------------------------------------------------|------------------------------------|---------------------------------------------------------|-------------------|----------------------------------------------------------|------------------------------------------------------|-------------------------------|---------------------------------------------------|------------------------------------------------------------------------------------------------------------------------------|-----------|--------------------------------------------------------------------------------------------------------------------------------------------------------------------------------------|
| substituted NiPc on carboxylated CNT dendritic network                                                                                          | cloth (2 cm × 1 cm × 0.1 cm)                                                                                                   | solid-state device                 | symmetric all-solid-state SC/FSC devices also assembled | devices in series |                                                          | (solid-state symmetric SC)                           | SC); 52.1 Wh kg <sup>-1</sup> | kg <sup>-1</sup> (FSC)                            | 95.4% after 35,000 cycles for FSC                                                                                            |           | state/flexible devices; unlike the present work, performance depends strongly on CNT conductive matrix and device engineering                                                        |
| Ni <sub>2</sub> [CuPc(NH) <sub>8</sub> ]/EG-2; phthalocyanine-based 2D c-MOF/graphene hybrid; exfoliated nanosheet MSC electrode                | Total active mass NR; interdigital in-plane pattern with 8 fingers (width 1 mm, length 10 mm, interspace 1 mm) on PI substrate | PVA/LiCl gel electrolyte           | In-plane all-solid-state MSC device                     | NR                | 2–50 mV s <sup>-1</sup> ; 0.04–0.4 mA cm <sup>-2</sup>   | 18.9 mF cm <sup>-2</sup> at 0.04 mA cm <sup>-2</sup> | NR                            | NR                                                | Outstanding cycling stability reported, but explicit retention value/cycle number not clearly visible in extracted main text | [7]       | Fundamentally different architecture: 2D c-MOF nanosheet/graphene micro-supercapacitor with areal capacitance metrics rather than conventional powder-film CuPc electrode comparison |
| n-TMe-Cu (this work); CuPc derivative; non-peripheral tetra-(3,4,5-trimethoxybenzyl)oxy-substituted CuPc, CB/PVDF-HFP film on flexible graphite | 1 mg active material on 1 cm <sup>2</sup>                                                                                      | 1 M H <sub>2</sub> SO <sub>4</sub> | Three-electrode                                         | NR                | 1 A g <sup>-1</sup> (0.2–2.0 A g <sup>-1</sup> explored) | 360 F g <sup>-1</sup> at 1 A g <sup>-1</sup>         | 67 Wh kg <sup>-1</sup>        | 99.97 W kg <sup>-1</sup> at 0.2 A g <sup>-1</sup> | 80% after 5000 cycles at 2 A g <sup>-1</sup>                                                                                 | This work | -                                                                                                                                                                                    |

## References

- [1] M. S. Ağırtas, B. Cabir, S. Özdemir, Novel metal (II) phthalocyanines with 3,4,5-trimethoxybenzyloxy-substituents: Synthesis, characterization, aggregation behaviour and antioxidant activity, *Dyes and Pigments* 96 (2013) 152-157. <https://doi.org/10.1016/j.dyepig.2012.07.023>.
- [2] N. Koçyiğit, M. B. Arvas, S. Yazar, N. Açar-Selçuki, Y. Şahin, M. Özer and Ö. Bekaroğlu, *Synth. Met.*, 2023, 292, 117242. <https://doi.org/10.1016/j.synthmet.2022.117242>
- [3] F. Qi, Y. Wang, J. Xu, X. Wang, J. Wang, H. Shan, M. Li and J. Xu, *Synth. Met.*, 2023, 293, 117284. <https://doi.org/10.1016/j.synthmet.2023.117284>
- [4] M. Samanta, P. Howli, U. K. Ghorai, M. Mukherjee, C. Bose and K. K. Chattopadhyay, *Phys. E Low-Dimens. Syst. Nanostruct.*, 2019, 114, 113654. <https://doi.org/10.1016/j.physe.2019.113654>
- [5] H. Y. Yenilmez, N. Farajzadeh Öztürk, Ö. Budak, Ö. İpsiz Öney, A. Koca and Z. Altuntaş Bayır, *Chem. Asian J.*, 2024, 19, e202400938. <https://doi.org/10.1002/asia.202400938>
- [6] Y. Wang, M. Li, R. Ramachandran, H. Shan, Q. Chen, A. Luo, F. Wang and Z.-X. Xu, *J. Energy Chem.*, 2023, 76, 214–225. <https://doi.org/10.1016/j.jechem.2022.08.046>
- [7] M. Wang, H. Shi, P. Zhang, Z. Liao, M. Wang, H. Zhong, F. Schwotzer, A. S. Nia, E. Zschech, S. Zhou, S. Kaskel, R. Dong and X. Feng, *Adv. Funct. Mater.*, 2020, 30, 2002664. <https://doi.org/10.1002/adfm.202002664>
